# Supplementary material for: Engineering of the CHAPk Staphylococcal Phage Endolysin to Enhance Antibacterial Activity against Stationary-Phase Cells
Source: MDPI journal article supplement (doi:10.3390/antibiotics10060722), 2021-06-16
Supplement: s1 [file s1]

Supplementary Information

# Engineering of the CHAPk Staphylococcal Phage Endolysin to Enhance Antibacterial Activity against Stationary-Phase Cells (Supplementary Information)

Sara Arroyo-Moreno <sup>1</sup>, Máire Begley <sup>1,2</sup>, Kornelia Dembicka <sup>1</sup> and Aidan Coffey <sup>1,2,\*</sup>

- <sup>1</sup> Department of Biological Sciences, Munster Technological University, T12 P928 Cork, Ireland; sara.arroyo-moreno@mycit.ie (S.A.-M.); maire.begley@cit.ie (M.B.); kornelia.dembicka@mycit.ie (K.D.)  
<sup>2</sup> APC Microbiome Institute, University College, T12 YT20 Cork, Ireland  
 \* Correspondence: aidan.coffey@cit.ie; Tel.: +353-214-335-486

```

ATG GCT AAG ACT CAA GCA GAA ATA AAT AAA CGT TTA GAT GCT TAT
M A K T Q A E I N K R L D A Y
GCA AAA GGA ACA GTA GAT AGC CCT TAC AGA GTT AAA AAA GCT ACA
A K G T V D S P Y R V K K A T
AGT TAT GAC CCA TCA TTT GGT GTA ATG GAA GCA GGA GCC ATT GAT
S Y D P S F G V M E A G A I D
GCA GAT GGT TAC TAT CAC GCT CAG TGT CAA GAC CTT ATT ACA GAC
A D G Y Y H A Q C Q D L I T D
TAT GTT TTA TGG TTA ACA GAT AAT AAA GTT AGA ACT TGG GGT AAT
Y V L W L T D N K V R T W G N
GCT AAA GAC CAA ATT AAA CAG AGT TAT GGT ACT GGA TTT AAA ATA
A K D Q I K Q S Y G T G F K I
CAT GAA AAT AAA CCT TCT ACT GTA CCT AAA AAA GGT TGG ATT GCG
H E N K P S T V P K K G W I A
GTA TTT ACA TCC GGT AGT TAT GAA CAG TGG GGT CAC ATA GGT ATT
V F T S G S Y E Q W G H I G I
GTA TAT GAT GGA GGT AAT ACT TCT ACA TTT ACT ATT TTA GAG CAA
V Y D G G N T S T F T I L E Q
AAC TGG AAT GGT TAT GCT AAT AAA AAA CCT ACA AAA CGT GTA GAT
N W N G Y A N K K P T K R V D
AAT TAT TAC GGA TTA ACT CAC TTC ATT GAA ATA CCT GTA AAA GCA
N Y Y G L T H F I E I P V K A
ATG GTT AAT TCA TTT TCA AAT TCA ACT GCC CAA GAT CCA ATG CCT
M V N S F S N S T A Q D P M P
TTC TTA AAG AGC GCA GGA TAT GGA AAA GCA GGT GGT ACA GTA ACT
F L K S A G Y G K A G G T V T
CCA ACG CCG AAT ACA GGT TGG AAA ACA AAC AAA TAT GGC ACA CTA
P T P N T G W K T N K Y G T L
TAT AAA TCA GAG TCA GCT AGC TTC ACA CCT AAT ACA GAT ATA ATA
Y K S E S A S F T P N T D I I
ACA AGA ACG ACT GGT CCA TTT AGA AGC ATG CCG CAG TCA GGA GTC
T R T T G P F R S M P Q S G V
TTA AAA GCA GGT CAA ACA ATT CAT TAT GAT GAA GTG ATG AAA CAA
L K A G Q T I H Y D E V M K Q
GAC GGT CAT GTT TGG GTA GGT TAT ACA GGT AAC AGT GGC CAA CGT
D G H V V V G Y T G N S G Q R
ATT TAC TTG CCT GTA AGA ACA TGG AAT AAA TCT ACT AAT ACT TTA
I Y L P V R T W N K S T N T L
GGT GTT CTT TGG GGA ACT ATA AAG CTC GAG CAC CAC CAC CAC CAC
G V L W G T I K L E H H H H H
CAC
H
  
```

**Figure S1.** Sequence of the chimeric protein CHAPk-SH3blys. Red sequence corresponds to CHAPk, blue sequence corresponds to the SH3b cell-binding domain from lysostaphin, and purple sequence represents the His-tag region.

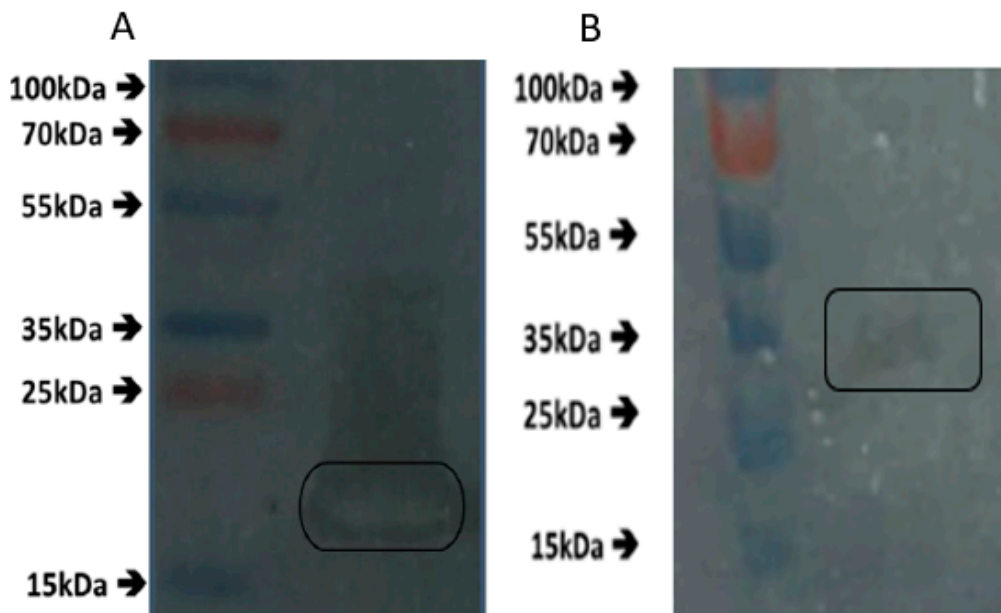

**Figure S2.** Zymogram using heat inactivated *S. aureus* DPC5246 cells, showing the lytic activity of; (A) CHAPk, having a band of clearing of approximately 20 KDa which corresponds to the predicted molecular mass of 18.6 kDa; (B) CHAPK-SH3blys, having a band of clearing of approximately 35 KDa which corresponds to the predicted molecular mass of 33.6 kDa.

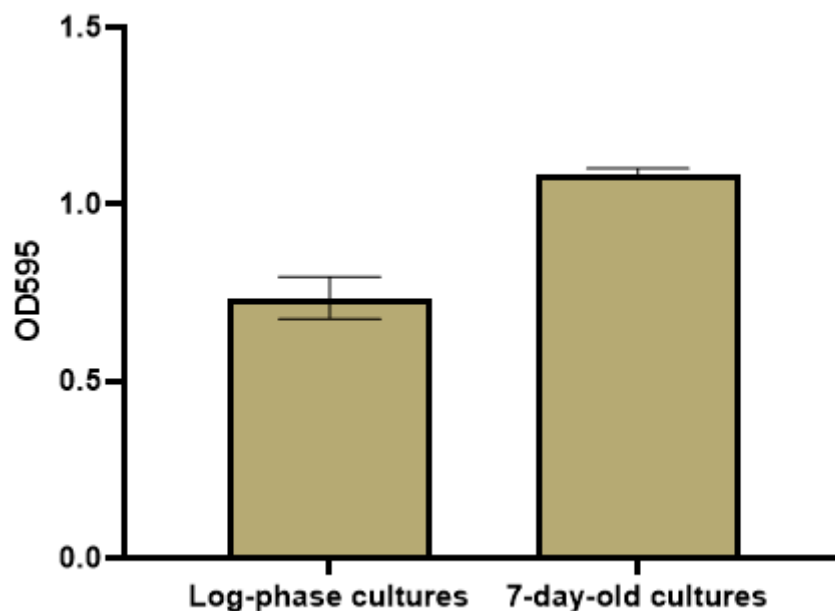

**Figure S3.** Density of biofilm cultivated from log-phase culture and 7-day-old culture. OD<sub>595</sub> readings are the average of triplicates plus/minus their standard deviation. Biofilms were cultivated at 37°C during 16h.

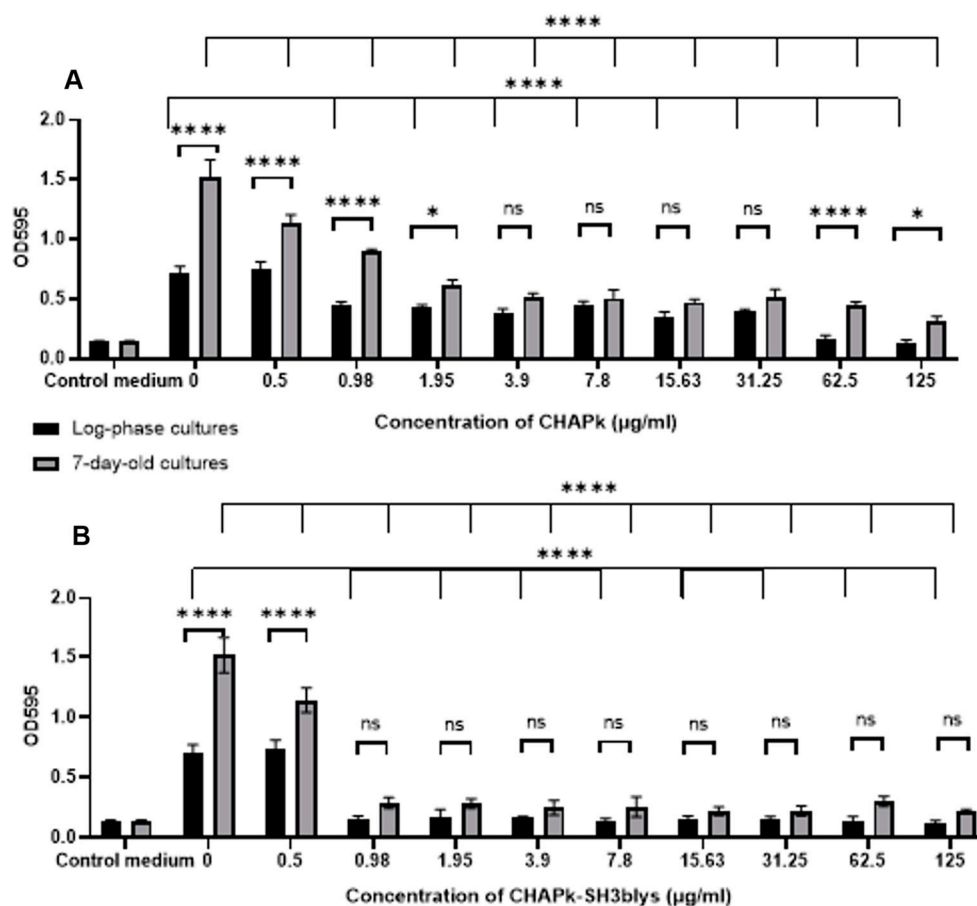

**Figure S4.** Biofilm prevention assay using concentrations of (A) CHAPk or (B) CHAPk-SH3bllys ranging from 0.5 to 125 µg/ml. OD<sub>595</sub> readings are the average of triplicates plus/minus their standard deviation. p-values <0.0001 are represented by \*\*\*\*. No significant statistical differences are represented by ns. p-values comparing concentrations of CHAPk (between biofilms from log-phase and 7-day-old cultures) 1.95 and 125 represented by \* were 0.022 and 0.0244, respectively.

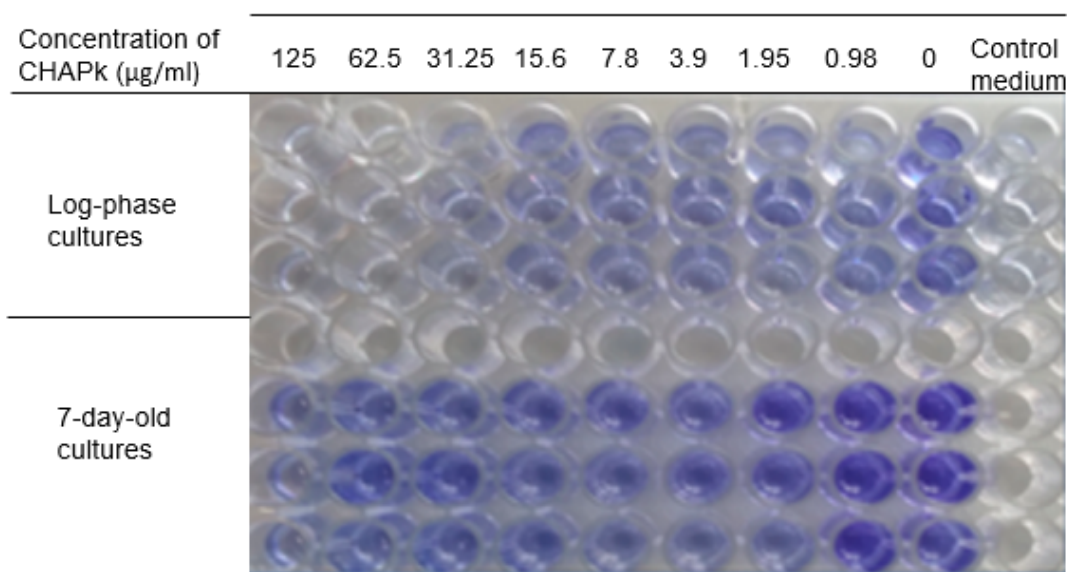

**Figure S5.** Biofilm prevention assay using concentrations of CHAPk ranging from 125 to 0.98 µg/ml. Visual representation of the 96-well plates after treatment with crystal violet.

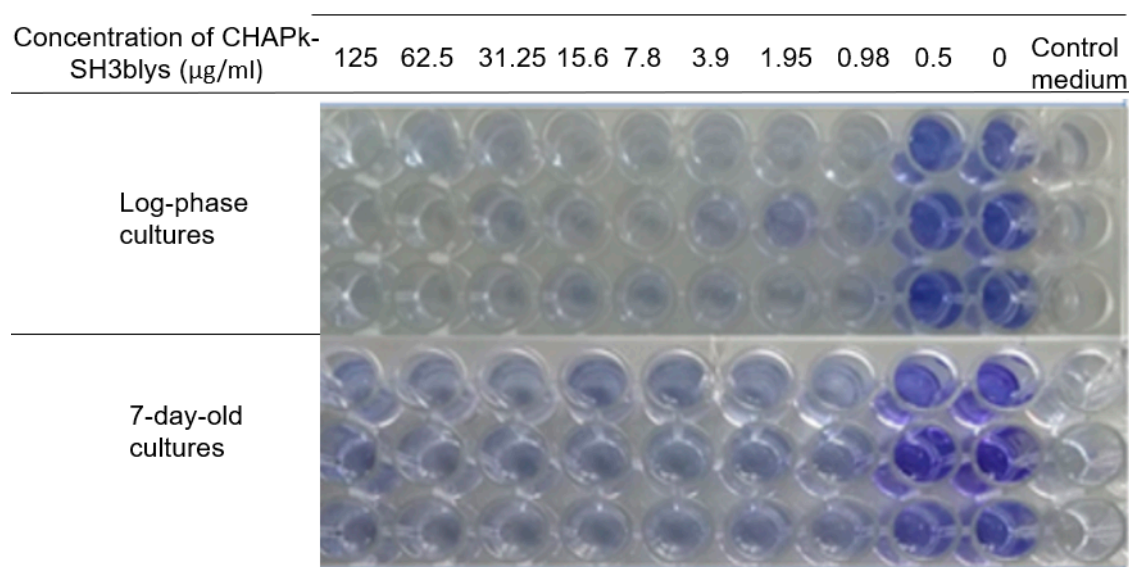

**Figure S6.** Biofilm prevention assay using concentrations of CHAPk-SH3blys ranging from 0.5 to 125  $\mu\text{g/ml}$ . Visual representation of the 96-well plates after treatment with crystal violet.

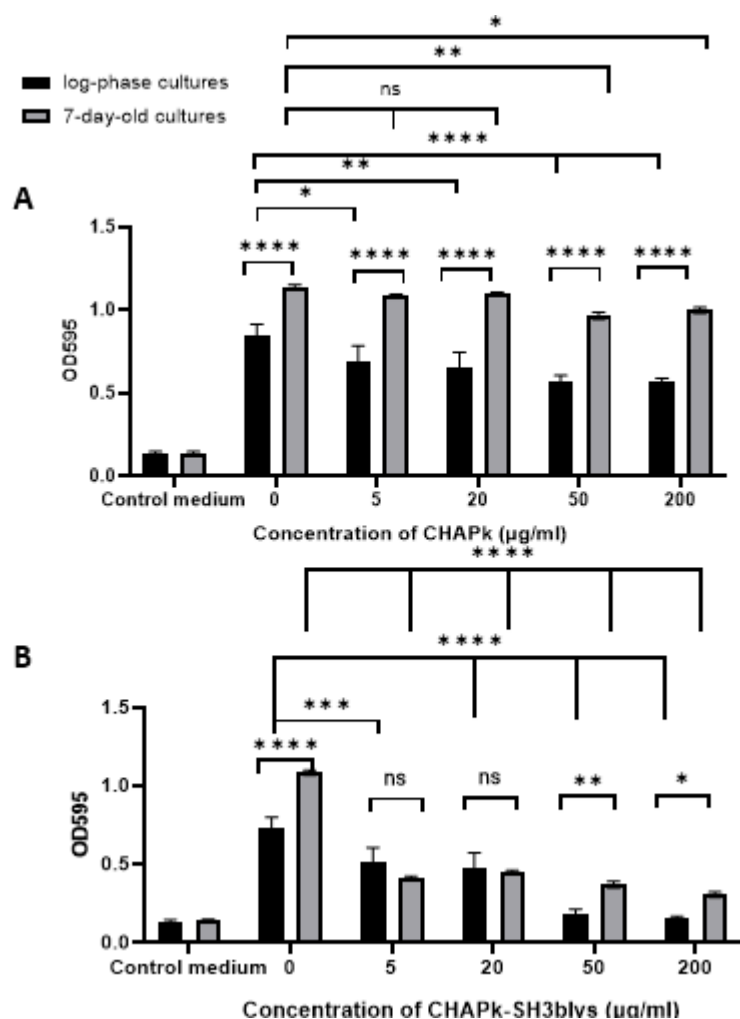

**Figure S7.** Biofilm disruption assay using *S. aureus* biofilms formed by cells in stationary and exponential phase. Concentrations of (A) CHAPk or (B) CHAPk-SH3blys, from 5 to 200 µg/ml, were used to disrupt biofilms. The disruption was determined by OD readings at 595nm. All readings are the average of triplicates plus/minus their standard deviation. P-values <0.0001 are represented by \*\*\*\*. No significant statistical differences are represented by ns. P-values comparing of untreated biofilm (formed from log-phase cultures) with concentrations of CHAPk of 5 and 20 µg/ml were 0.0136 and 0.011, respectively. P-values comparing untreated biofilm (formed from 7-day-old cultures) with concentrations of CHAPk of 50 and 200 µg/ml were 0.0060 and 0.043, respectively. P-value comparing untreated biofilm (formed from log-phase cultures) with a concentration of CHAPk-SH3blys of 5 µg/ml was 0.0002. P-values comparing CHAPk concentrations of 50 and 200 µg/ml (between biofilms from log-phase and 7-day-old cultures) were 0.006 and 0.043, respectively. P-values CHAPk-SH3blys concentrations of 50 and 200 were (between biofilms from log-phase and 7-day-old cultures) 0.0015 and 0.018, respectively.

| Concentration of CHAPk<br>( $\mu\text{g/ml}$ ) | 200                                                                                | 50 | 20 | 5 | 0 |
|------------------------------------------------|------------------------------------------------------------------------------------|----|----|---|---|
| Log-phase cultures                             | 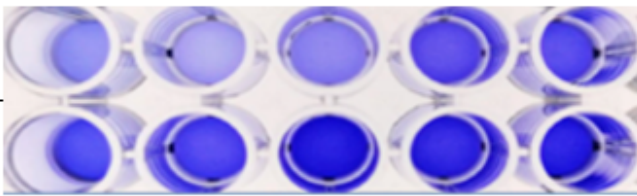 |    |    |   |   |
| 7-day-old cultures                             |                                                                                    |    |    |   |   |

**Figure S8.** Biofilm disruption assay using *S. aureus* biofilms formed by cells in log-phase and 7-day-old cultures. Concentrations of CHAPk from 5 to 200  $\mu\text{g/ml}$ , were used to disrupt biofilms. Visual representation of the 96-well plates after treatment with crystal violet.

| Concentration of CHAPk-SH3blys<br>( $\mu\text{g/ml}$ ) | 0                                                                                   | 200 | 50 | 20 | 5 |
|--------------------------------------------------------|-------------------------------------------------------------------------------------|-----|----|----|---|
| Log-phase cultures                                     | 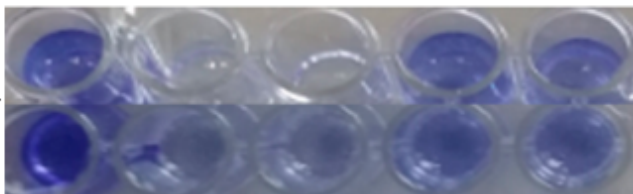 |     |    |    |   |
| 7-day-old cultures                                     |                                                                                     |     |    |    |   |

**Figure S9.** Biofilm disruption assay using *S. aureus* biofilms formed by cells in log-phase and 7-day-old cultures. Concentrations of CHAPk-SH3blys from 5 to 200  $\mu\text{g/ml}$ , were used to disrupt biofilms. Visual representation of the 96-well plates after treatment with crystal violet.
